# Supplementary material for: A multiscale in situ high temperature high resolution transmission electron microscopy study of ThO2 sintering
Source: Royal Society of Chemistry journal article supplement (doi:10.1039/d1nr00956g), 2021-01-01

Supplementary file S1. XRD pattern and TEM micrograph of the ThO<sub>2</sub> nanoparticles of 50 nm in size prepared by wet-chemistry route.

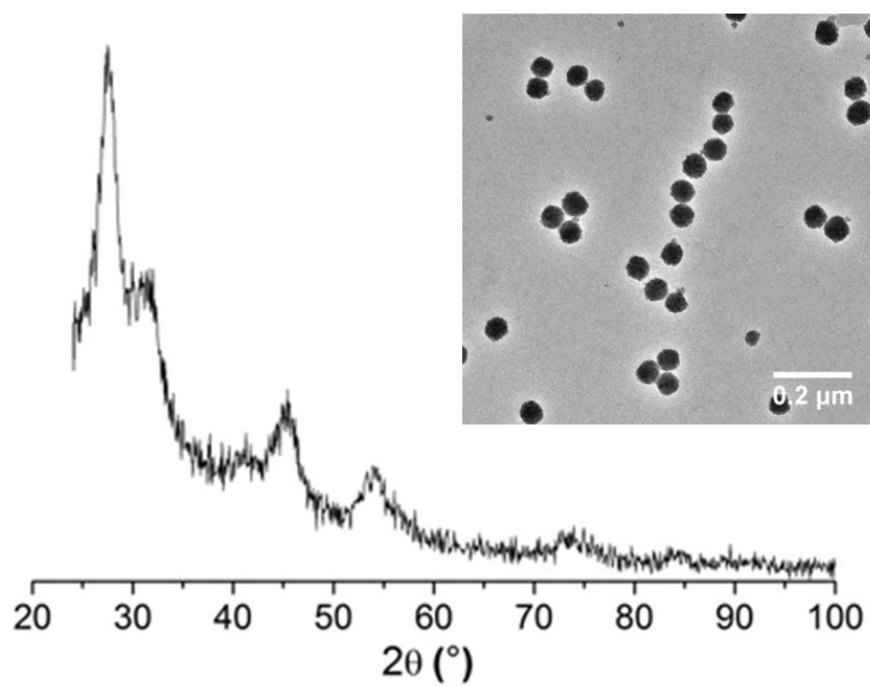

Supplement: d1nr00956g1.pdf [file d1nr00956g1.pdf]
